# Supplementary material
Source: ML conference proceedings conference paper supplement (https://openaccess.thecvf.com/content/ICCV2025/html/Lee_CF3_Compact_and_ICCV_2025_paper.html)
Supplement: Supplementary file 1 [file 04513_supp.pdf › 04513_supp.pdf]

# CF<sup>3</sup>: Compact and Fast 3D Feature Fields

## Supplementary Material

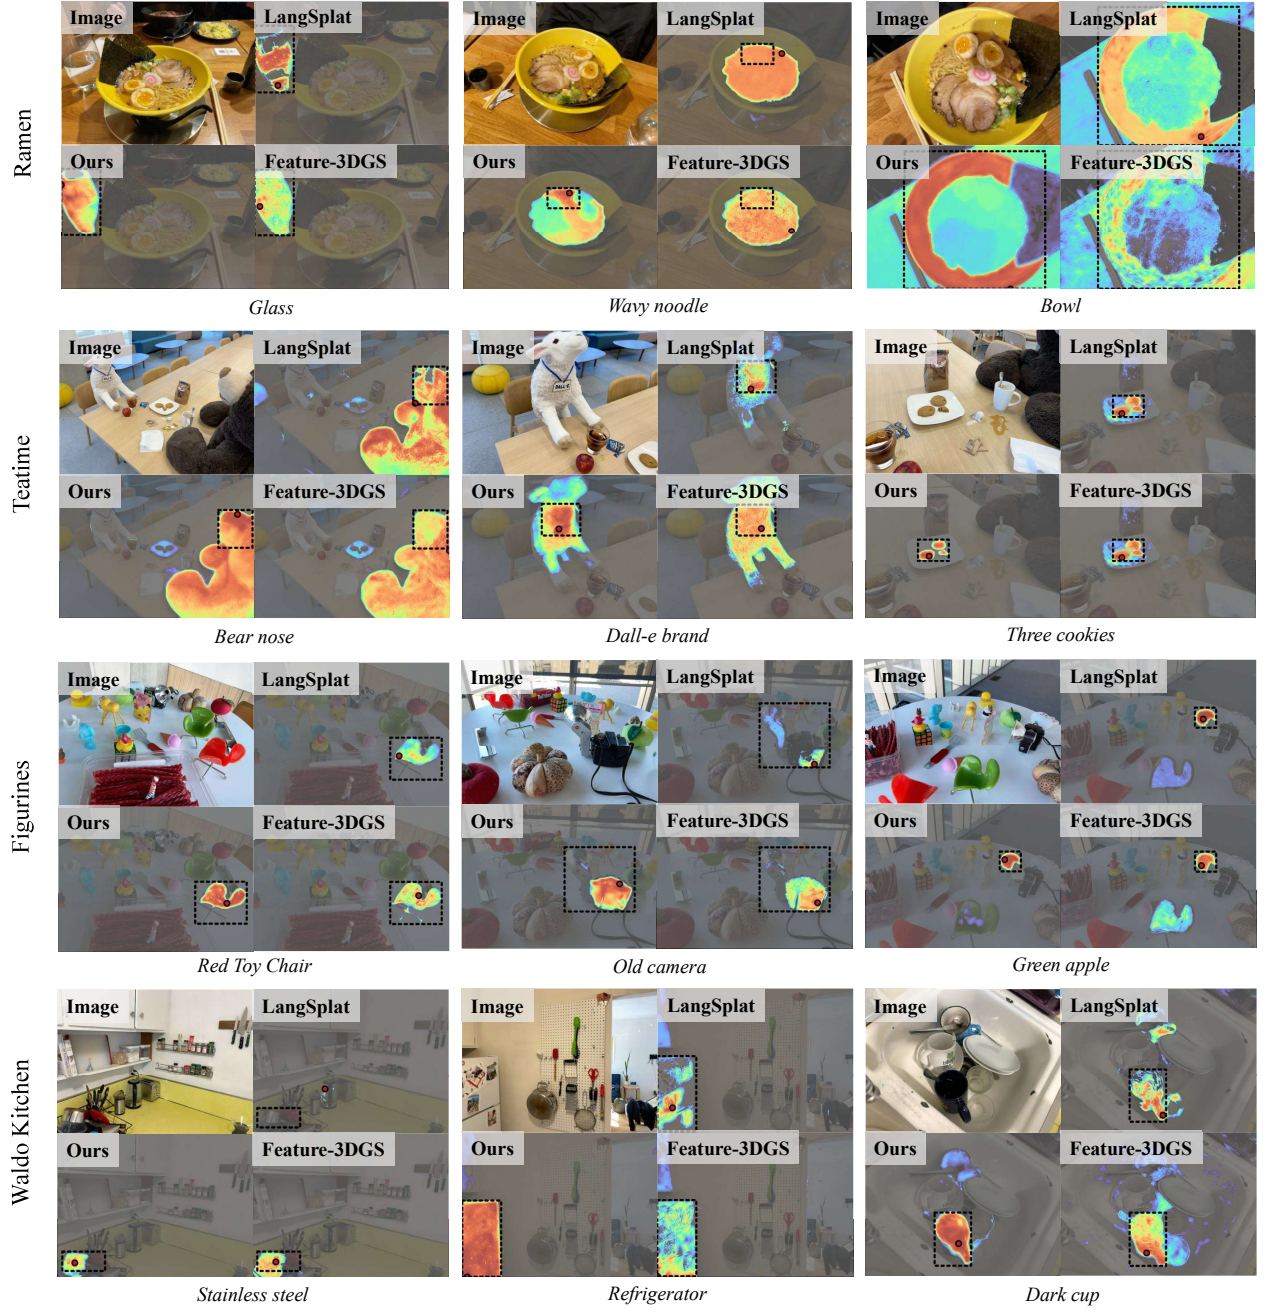

Figure A. Additional Result on LERF Dataset.

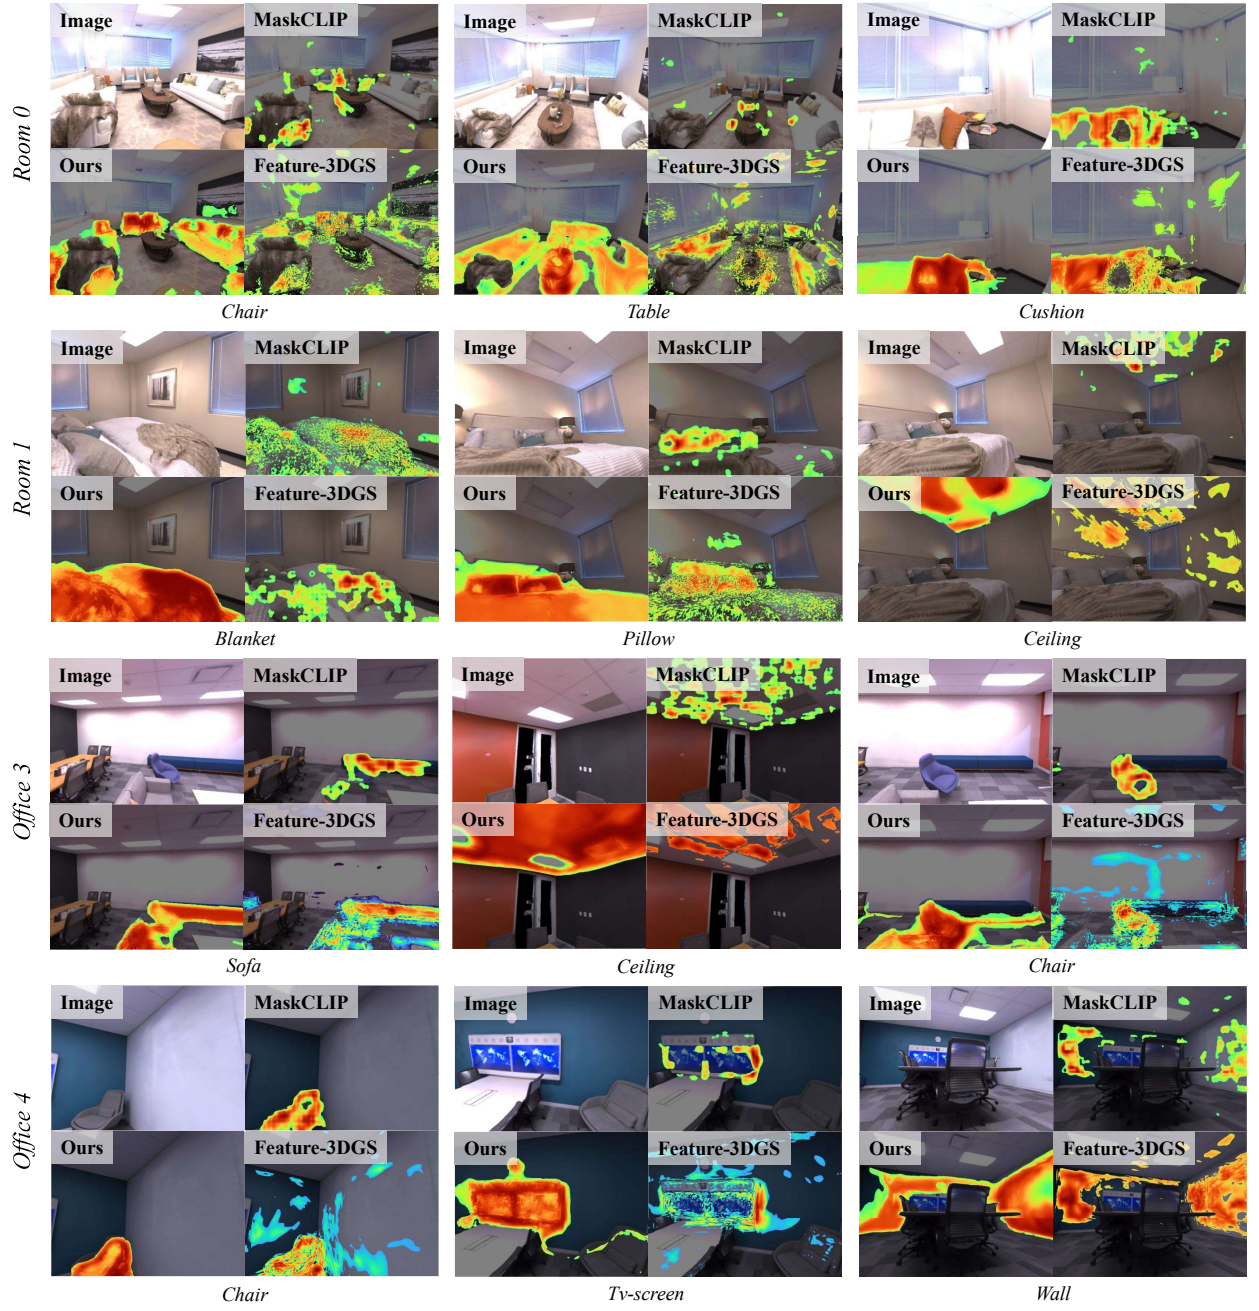

Figure B. Additional Result on Replica Dataset.



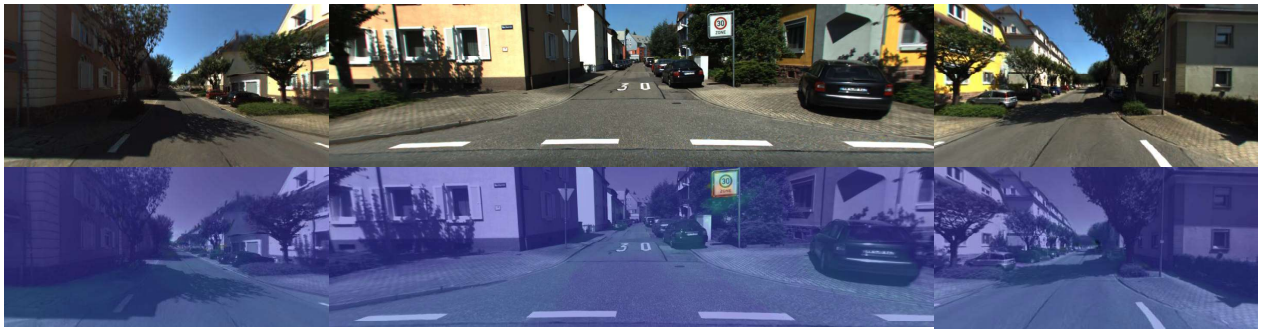

*Speed limit 30 zone sign*

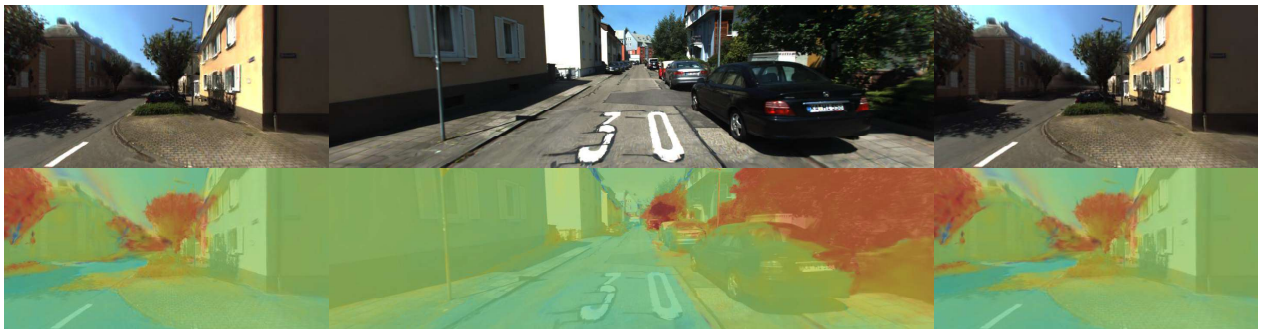

*Tree*

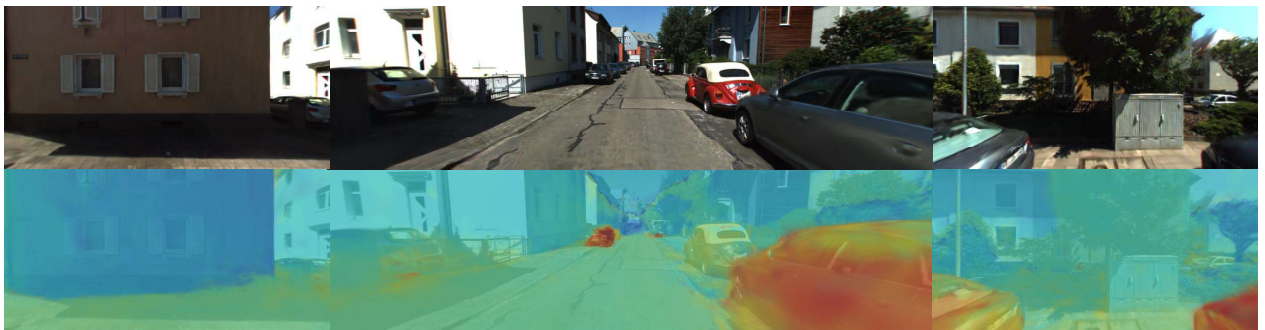

*Black Car*

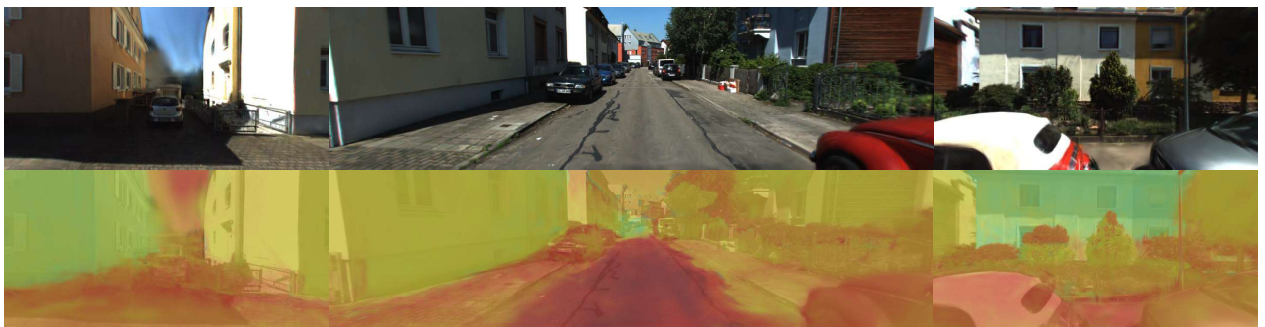

*Road*

**Figure C. Additional Result on KITTI-360 Dataset.**

## A. Additional Details

In MaskCLIP evaluation, we measured mIoU by selecting 5 to 6 categories among the labels provided with the replica gt segmentation map. The dataset used was Replica room\_0, room\_1, office\_3, and office\_4 for LSeg and MaskCLIP evaluation used by Feature-3DGS. We used 3,000 iterations and a merge interval of 50. We set thresholds as  $\tau_{con} = 0.25$ ,  $\tau_{sim} = 0.999$ ,  $\tau_{grad} = 10^{-5}$ , and  $\chi_{\beta}^2 = 2.38$ .

## B. Compatibility with 3DGS Compression

While conventional 3DGS compression approaches focus on reducing storage for color attributes, our method targets feature representation and achieves higher compression efficiency. For reference, Tab. A shows that CF<sup>3</sup> achieves lower storage than efficient color 3DGS methods on the full MipNeRF360 dataset [3]. Therefore, our feature field can be combined with existing 3DGS compression methods [1, 4, 6, 24, 33] to represent color and feature field jointly with little extra storage cost (for example 8.7MB + 2.5MB when

| Compact3D | HAC-high | HAC-low | CodecGS | HAC++high | HAC++low | CF <sup>3</sup> +VQ |
|-----------|----------|---------|---------|-----------|----------|---------------------|
| 18MB      | 23MB     | 16MB    | 10MB    | 19MB      | 8.7MB    | 2.5MB               |

Table A. **Storage comparison with 3DGS.zip[2] results on MipNeRF360 dataset.** Baselines compress the 3DGS, which is designed for color representation. In contrast, CF<sup>3</sup> represents semantic features as a separate field, yet achieves smaller storage.
